# Supplementary material for: Flash flood warnings in context: combining local knowledge and large-scale hydro-meteorological patterns
Source: Copernicus journal article supplement (doi:10.5194/nhess-22-461-2022), 2022-02-16
Supplement: Supplementary file 1 [file nhess-22-461-2022-supplement.zip]

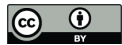

## *Supplement of*

# **Flash flood warnings in context: combining local knowledge and large-scale hydro-meteorological patterns**

**Agathe Bucherie et al.**

*Correspondence to:* Agathe Bucherie (agathe.bucherie@gmail.com)

- nhess-22-461-2022-supplement-title-page.pdf
- Supplementary materials
  - 3. Materials and methods
    - \* 3.1\_Field\_data\_collection\_program\_protocol.pdf
    - \* 3.2\_Building\_knowledge\_data\_collection\_analysis\_Workflow.png
  - 4. Results
    - \* 4.1 Building knowledge on Flash Flooding
    - \* 4.2 Geomorphological analysis
    - \* 4.3 Hydro-meteorological analysis
  - 5. Discussion
    - \* Fig\_5.1.1\_pred\_workflow.pdf
    - \* Fig\_S5.1.2\_pred\_result.pdf
    - \* Table\_S5.1\_Prediction\_model\_results.PNG

The copyright of individual parts of the supplement might differ from the article licence.
