# Supplementary material for: Flash flood warnings in context: combining local knowledge and large-scale hydro-meteorological patterns
Source: Copernicus journal article supplement (doi:10.5194/nhess-22-461-2022), 2022-02-16
Supplement: Supplementary file 5 [file nhess-22-461-2022-supplement.zip]

Archive with 20 entries (13 files):
- Supplementary materials/
- Supplementary materials/5. Discussion/
- Supplementary materials/5. Discussion/Table_S5.1_Prediction_model_results.PNG
- Supplementary materials/5. Discussion/Fig_S5.1.2_pred_result.pdf
- Supplementary materials/5. Discussion/Fig_5.1.1_pred_workflow.pdf
- Supplementary materials/3.Materials and methods/
- Supplementary materials/3.Materials and methods/3.1_Field_data_collection_program_protocol.pdf
- Supplementary materials/3.Materials and methods/3.2_Building_knowledge_data_collection_analysis_Workflow.png
- Supplementary materials/4.Results/
- Supplementary materials/4.Results/4.2 Geomorphological analysis/
- Supplementary materials/4.Results/4.2 Geomorphological analysis/Fig_S4.2.3_PCA_composite_maps.png
- Supplementary materials/4.Results/4.2 Geomorphological analysis/Table_S4.2.1_PCA_Indicators.xlsx
- Supplementary materials/4.Results/4.2 Geomorphological analysis/Table_S4.2.2_PCA_composite.xlsx
- Supplementary materials/4.Results/4.2 Geomorphological analysis/Fig_S4.2.2_Indicators_graph_PCA.png
- Supplementary materials/4.Results/4.1 Building knowledge on Flash Flooding/
- Supplementary materials/4.Results/4.1 Building knowledge on Flash Flooding/FGD_Posters.pdf
- Supplementary materials/4.Results/4.3 Hydro-meteorological analysis/
- Supplementary materials/4.Results/4.3 Hydro-meteorological analysis/Table_S4.3.2_FlashFlood_catalogue.xlsx
- Supplementary materials/4.Results/4.3 Hydro-meteorological analysis/Fig_S4.3.1_GSMAP_HourlyP_Jan_Apr.pdf
- nhess-22-461-2022-supplement-title-page.pdf
